# Supplementary material for: Light-assisted anti-wrinkling on azobenzene-containing polyblend films
Source: Royal Society of Chemistry journal article supplement (doi:10.1039/d2sm00630h), 2022-01-01
Supplement: d2sm00630h1.pdf [file d2sm00630h1.pdf]

## Supporting Information

### Light-Assisted Anti-Wrinkling on Azobenzene-Containing Polyblend Films

*Juanjuan Wang,<sup>1,#</sup> Haipeng Ji,<sup>2,#</sup> Yanqian Guo<sup>1</sup>, Bin Wang,<sup>3</sup> Xue Han,<sup>1</sup> Lele Li,<sup>4</sup> Fuqi Wu,<sup>3</sup> Jingqing Li,<sup>4,\*</sup> and Conghua Lu<sup>1,\*</sup>*

<sup>1</sup> School of Materials Science and Engineering, Tianjin Key Laboratory of Building Green Functional Materials, Tianjin Chengjian University, Tianjin 300384, China.

\*E-mail: chlu@tju.edu.cn

<sup>2</sup> No 46 Institute, China Aerospace Science and Industry Corporation Sixth Academy, Huhhot 010010, China.

<sup>3</sup> School of Science, Tianjin Chengjian University, Tianjin 300384, China.

<sup>4</sup> School of Materials Science and Engineering, Tianjin University, Tianjin 300072, China.

\*E-mail: jqli11103@tju.edu.cn

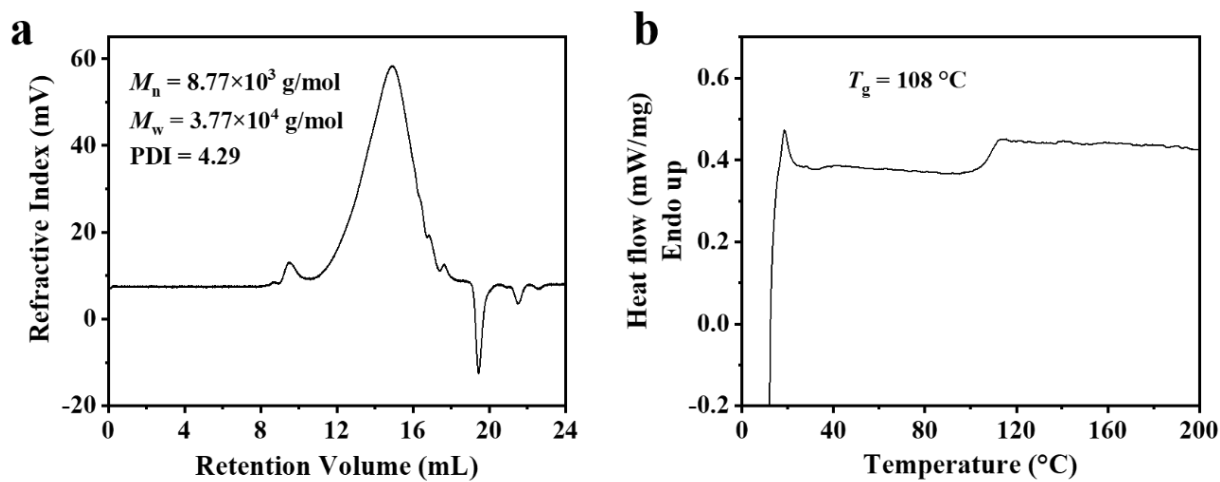

**Figure S1.** The GPC (a) and DSC (b) curves of the obtained PAAB.

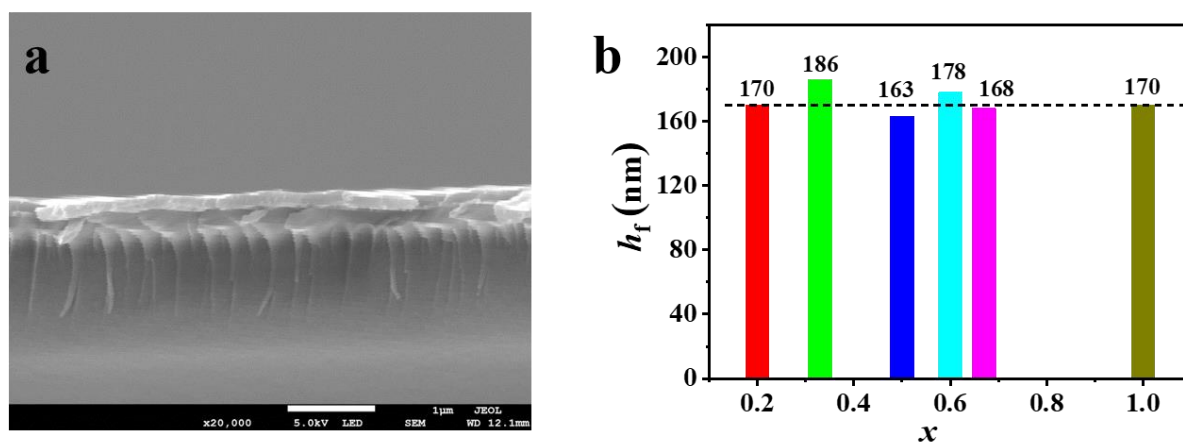

**Figure S2.** (a) Typical SEM image of the cross-section of the PAAB<sub>*x*</sub>-PMMA<sub>1-*x*</sub> film when  $x = 0.6$ . (b) The relation of the thickness ( $h_f$ ) of PAAB<sub>*x*</sub>-PMMA<sub>1-*x*</sub> films with  $x$ .

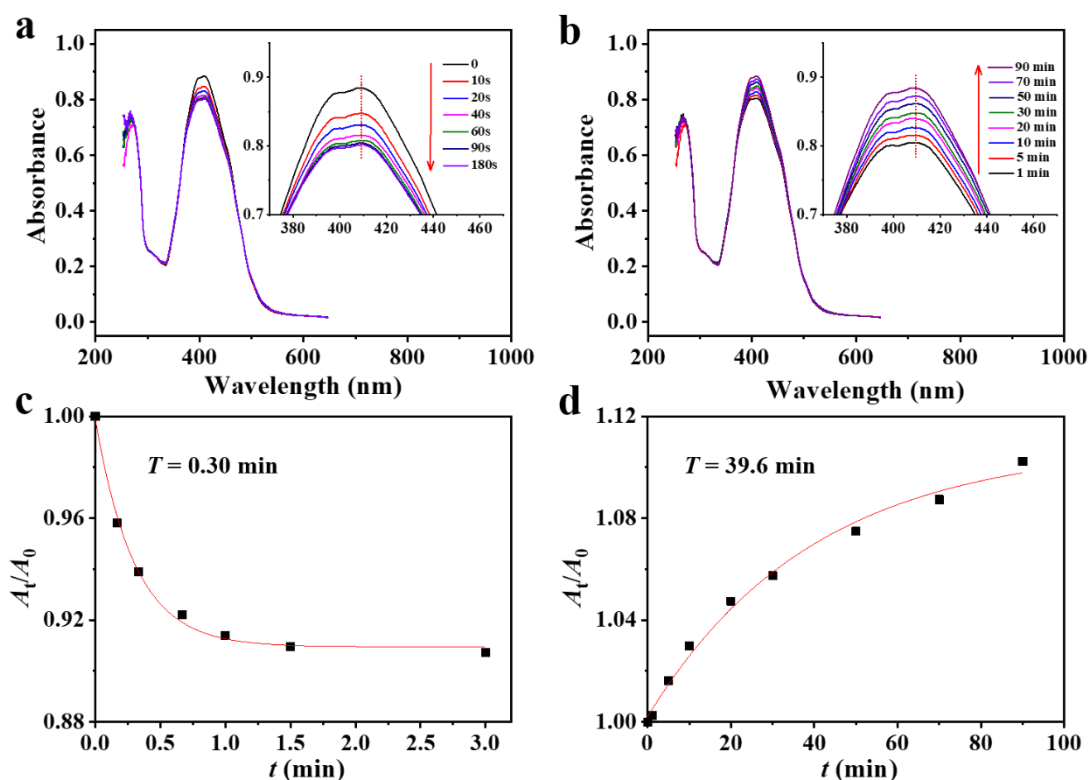

**Figure S3.** UV-Vis absorption spectrum evolution (a, b) and the relationship between the relative absorbance  $A_t/A_0$  and time  $t$  (c, d) of the PAAB film with visible light irradiation at  $I = 5 \text{ mW/cm}^2$  (a, c) and its recovery in darkness (b, d). Inset in (a,b) is the corresponding spectrum magnification around the  $\lambda_{\text{max}}$ . The solid line in (c,d) is the corresponding fitting curve.

The photoisomerization of azo-moieties is sensitive to the local environment surrounding the moieties, which can be evaluated by measuring the isomerization rate.<sup>1</sup> From Figure S3a,b, the absorbance at  $\lambda_{\text{max}}$  before the light irradiation ( $A_0$ ) and after the irradiation for different time ( $A_t$ ) can be obtained. The relative absorbance ( $A_t/A_0$ ) of the samples represents the relative amount of the *trans* isomers remaining at the time  $t$ . Furthermore, the variations of  $A_t/A_0$  with  $t$  indicate the kinetics of the photoisomerization. For Figure S3c,d, the variations can be best fitted by the first-order exponential decay function

$$A_t/A_0 = A' + A'' \exp(-t/T) \quad (\text{S1})$$

where  $T$  is the characteristic time of the decay process. The R-Square (COD) values in the above fittings are  $>0.99$ .  $T$  obtained from the curve fitting is 0.30 min and 39.6 min for Figure S3c,d, respectively.

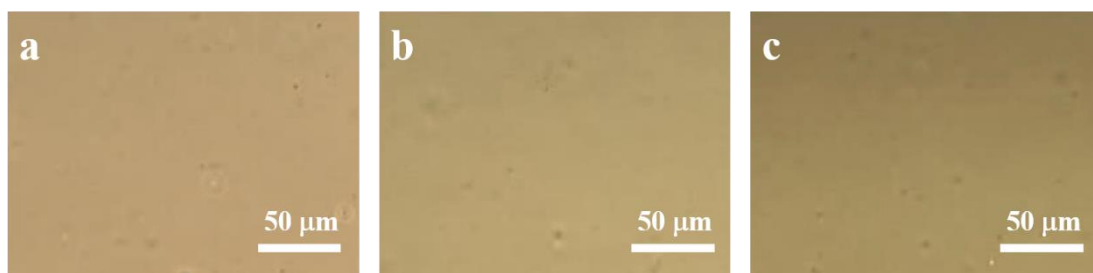

**Figure S4.** Optical images of as-prepared PAAB<sub>*x*</sub>-PMMA<sub>1-*x*</sub> films on the PDMS substrate with  $x = 0.20$  (a), 0.50 (b), 0.67 (c), respectively.

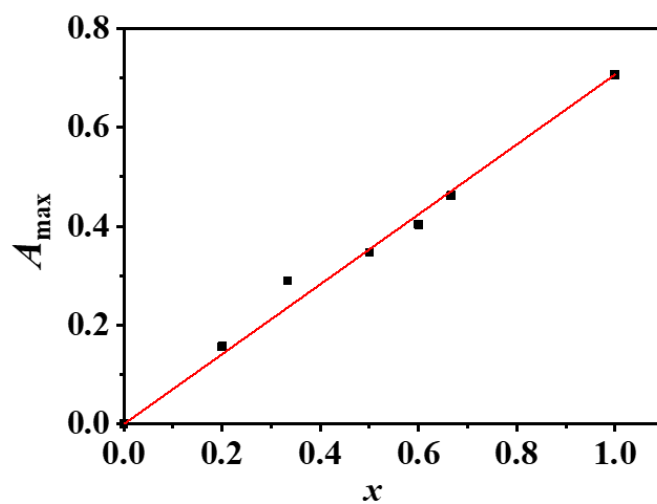

**Figure S5.** The dependence of  $A_{\max}$  on  $x$ . The solid line is from the linear regression of data pairs.

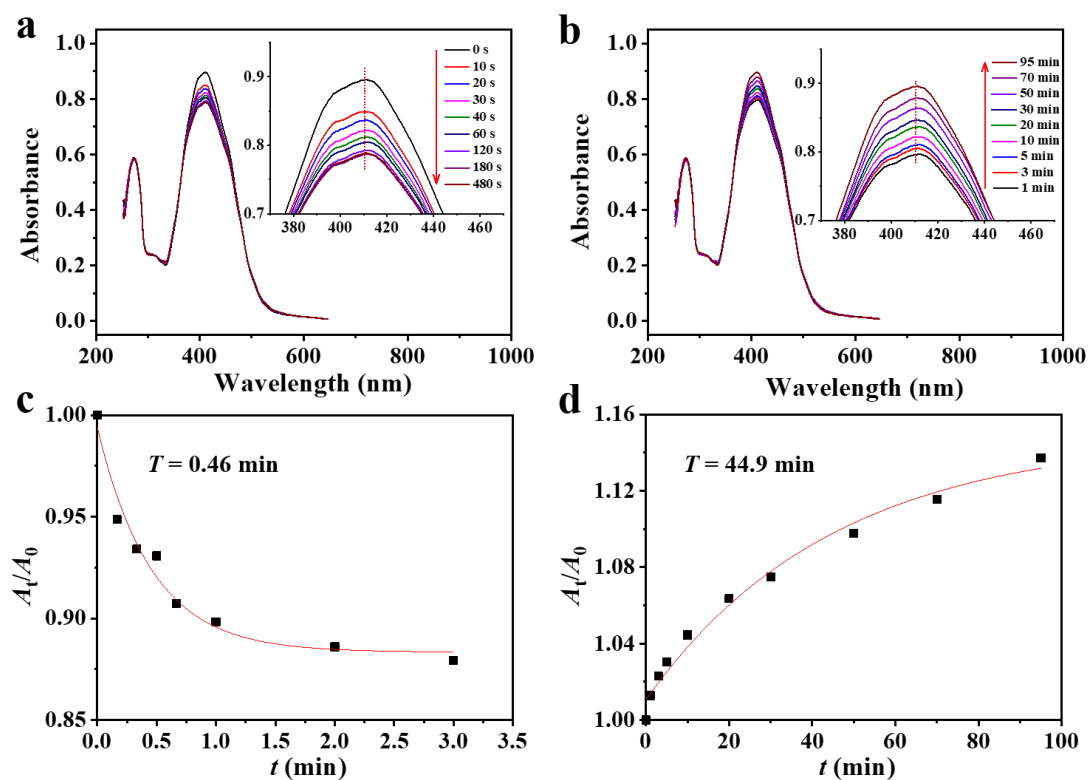

**Figure S6.** UV-Vis absorption spectrum evolution (a, b) and the relationship between the relative absorbance  $A_t/A_0$  and time  $t$  (c, d) of the PAAB<sub>0.5</sub>-PMMA<sub>0.5</sub> film with visible light irradiation at  $I = 5$  mW/cm<sup>2</sup> (a, c) and its recovery in darkness (b, d). The inset in (a,b) is the corresponding spectrum magnification around the  $\lambda_{\max}$ . The solid line in (c,d) is the corresponding fitting curve.

For Figure S6c,d, the variations of  $A_t/A_0$  with  $t$  can also be best fitted by the first-order exponential decay function (Equation (S1)), where both COD values are  $>0.97$ .  $T$  obtained from the curve fitting is 0.46 min and 44.9 min for Figure S6c,d, respectively. Comparing with the PAAB film, the photo-induced *trans*→*cis* isomerization and thermal-induced *cis*→*trans* isomerization rate decline for the PAAB<sub>0.5</sub>-PMMA<sub>0.5</sub> film.

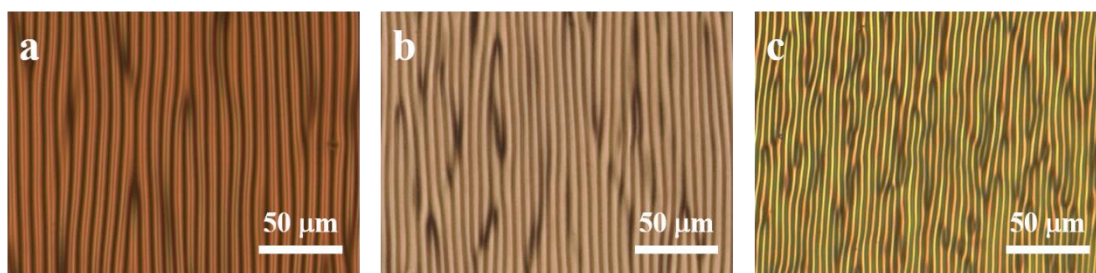

**Figure S7.** Optical images of the (PAAB<sub>0.5</sub>-PMMA<sub>0.5</sub>)/PDMS bilayer after releasing prestrain with  $\varepsilon = 10\%$  during visible light irradiation at  $i = 0$  (a), 3 (b), 12 (c) MPa, respectively.

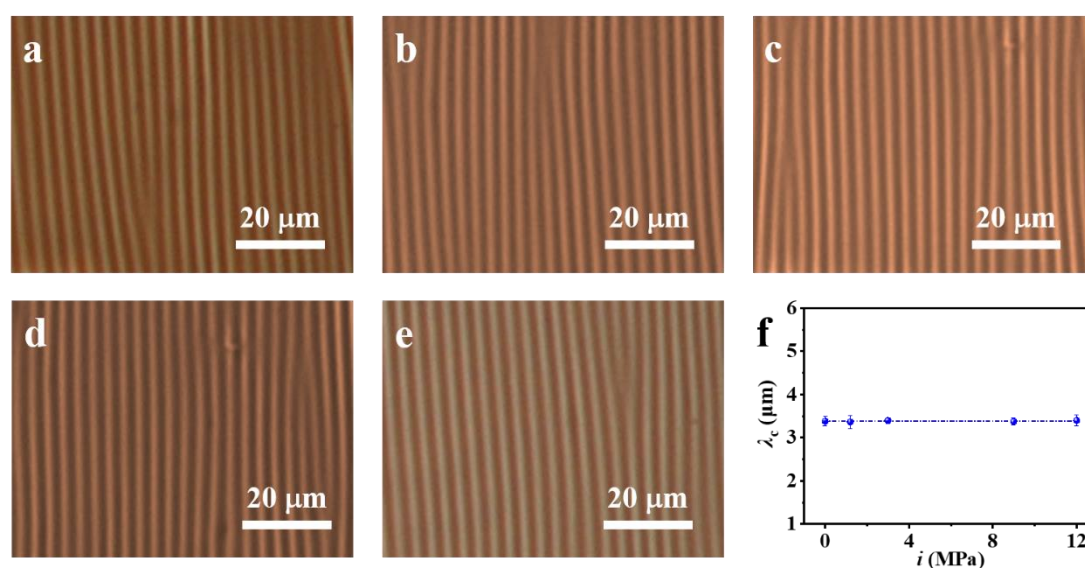

**Figure S8.** (a-e) Optical images of the PMMA/PDMS bilayer after releasing prestrain with  $\varepsilon = 2\%$  during the visible light irradiation at  $i = 0$  (a), 1.2 (b), 3 (c), 9 (d) and 12 (e) MPa, respectively. (f) Plots of  $\lambda_c$  as a function of  $i$ .

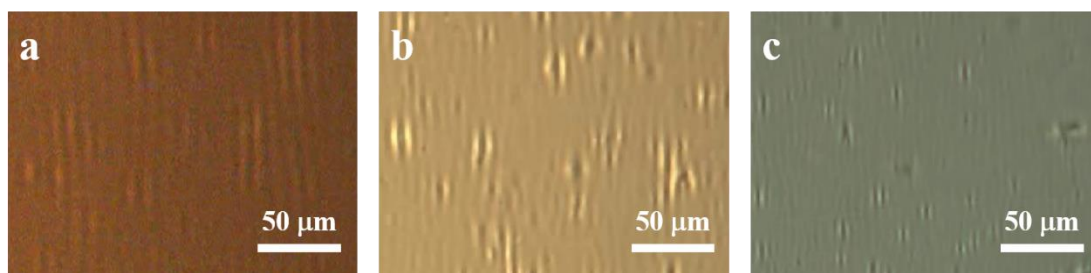

**Figure S9.** Optical images of the critical wrinkling PAAB<sub>0.5</sub>-PMMA<sub>0.5</sub> film on the PDMS substrate with  $i$ : 0 (a), 3 (b), 12 (c) MPa, respectively.

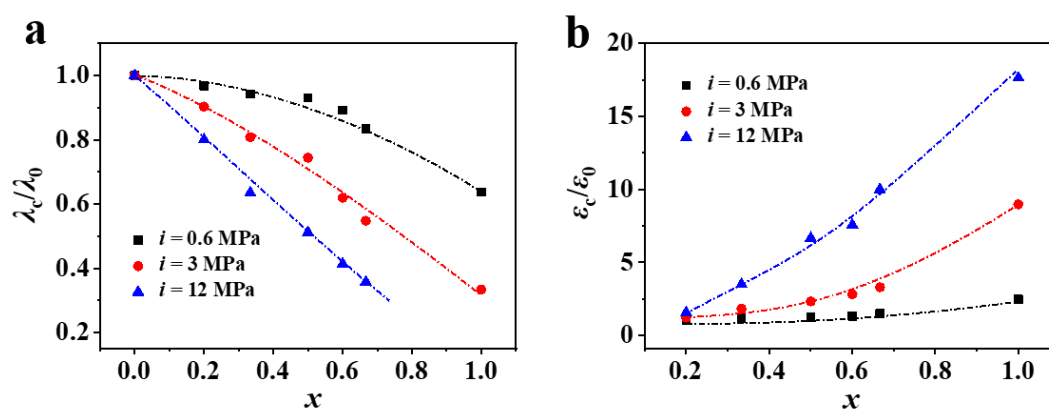

**Figure S10.** The dependence of  $\lambda_c/\lambda_0$  (a) and  $\epsilon_c/\epsilon_0$  (b) on  $x$  in the PAAB <sub>$x$</sub> -PMMA<sub>1- $x$</sub>  films under different experiment condition  $i$  employed. The dashed lines were drawn to visualize the general trend.

## REFERENCES

1. Y. Deng, Y. Li, X. Wang, Colloidal sphere formation, H-aggregation, and photoresponsive properties of an amphiphilic random copolymer bearing branched azo side chains. *Macromolecules* **2006**, *39*, 6590-6598.
